# Supplementary material for: NK cell expansion requires HuR and mediates control of solid tumors and long-term virus infection
Source: PubMed Central journal article supplement (PMC10497399; doi:10.1084/jem.20231154), 2023-09-12
Supplement: JEM_20231154_SourceDataF5.pdf [file JEM_20231154_SourceDataF5.pdf]

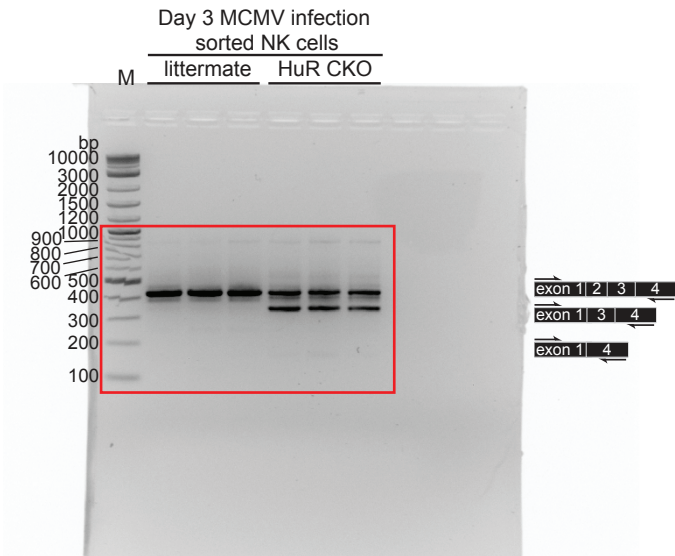

the gel broke during transfer to imager causing an artefact in the marker lane (M) containing Purple 1 kb Plus DNA ladder from New England BioLabs
